# Supplementary material for: Cell-Mediated Immunoreactivity of Poly(2-isopropenyl-2-oxazoline) as Promising Formulation for Immunomodulation
Source: Materials (Basel). 2021 Mar 12;14(6):1371. doi: 10.3390/ma14061371 (PMC7999147; doi:10.3390/ma14061371)
Supplement: Supplementary file 1 [file materials-14-01371-s001.pdf]

# Cell-Mediated Immunoreactivity of Poly(2-isopropenyl-2-oxazoline) as Promising Formulation for Immunomodulation

Ema Paulovičová <sup>1</sup>, Zuzana Kroneková <sup>2</sup>, Lucia Paulovičová <sup>1</sup>, Monika Majerčíková <sup>2</sup> and Juraj Kronek <sup>2,\*</sup>

<sup>1</sup> Immunol & Cell Culture Laboratories, Department Immunochemistry of Glycoconjugates, Center of Glycomics, Institute of Chemistry, Slovak Academy of Sciences, Dúbravská cesta 9, 845 38 Bratislava, Slovakia; ema.paulovicova@savba.sk (E.P.); lucia.paulovicova@savba.sk (L.P.)

<sup>2</sup> Department for Biomaterials Research, Polymer Institute, Slovak Academy of Sciences, Dubravska cesta 9, 845 41 Bratislava, Slovakia; zuzana.kronekova@savba.sk (Z.K.); upolmoma@savba.sk (M.M.)

\* Correspondence: Juraj.kronek@savba.sk; Tel.: +421-2-3229-4366

**Citation:** Paulovičová, E.; Kroneková, Z.; Paulovičová, L.; Majerčíková, M.; Kronek, J. Cell-Mediated Immunoreactivity of Poly(2-isopropenyl-2-oxazoline) as Promising Formulation for Immunomodulation. *Materials* **2021**, *14*, 1371. <https://doi.org/10.3390/ma14061371>

Academic Editor: Montserrat Colilla, Yury Skorik

Received: 20 December 2020

Accepted: 8 March 2021

Published: 12 March 2021

**Publisher's Note:** MDPI stays neutral with regard to jurisdictional claims in published maps and institutional affiliations.

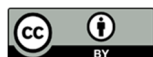

**Copyright:** © 2021 by the authors. Licensee MDPI, Basel, Switzerland. This article is an open access article distributed under the terms and conditions of the Creative Commons Attribution (CC BY) license (<http://creativecommons.org/licenses/by/4.0/>).

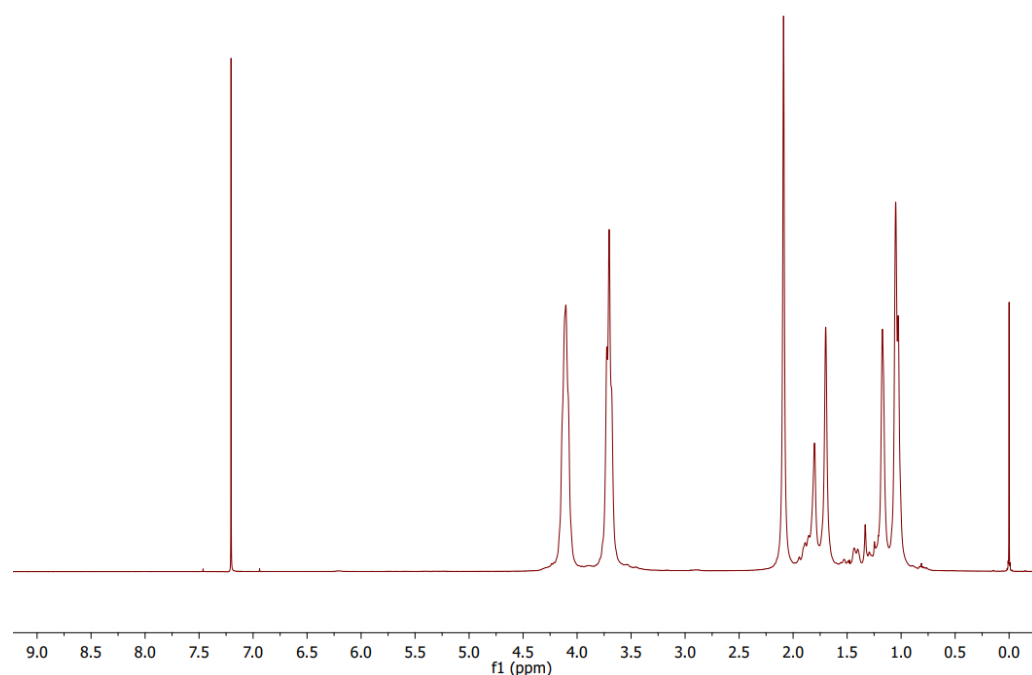

**Figure S1.** <sup>1</sup>H NMR spectrum of PIPOx measured in CDCl<sub>3</sub>.

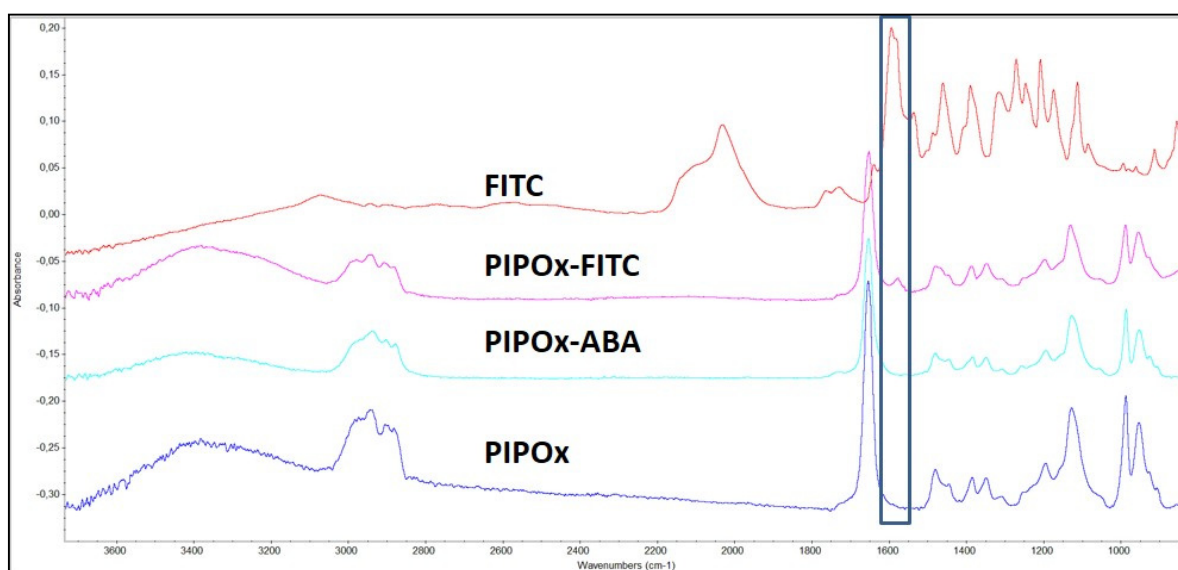

**Figure S2.** ATR-FTIR spectrum of PIPOx, PIPOx-ABA, and PIPOx-FITC.

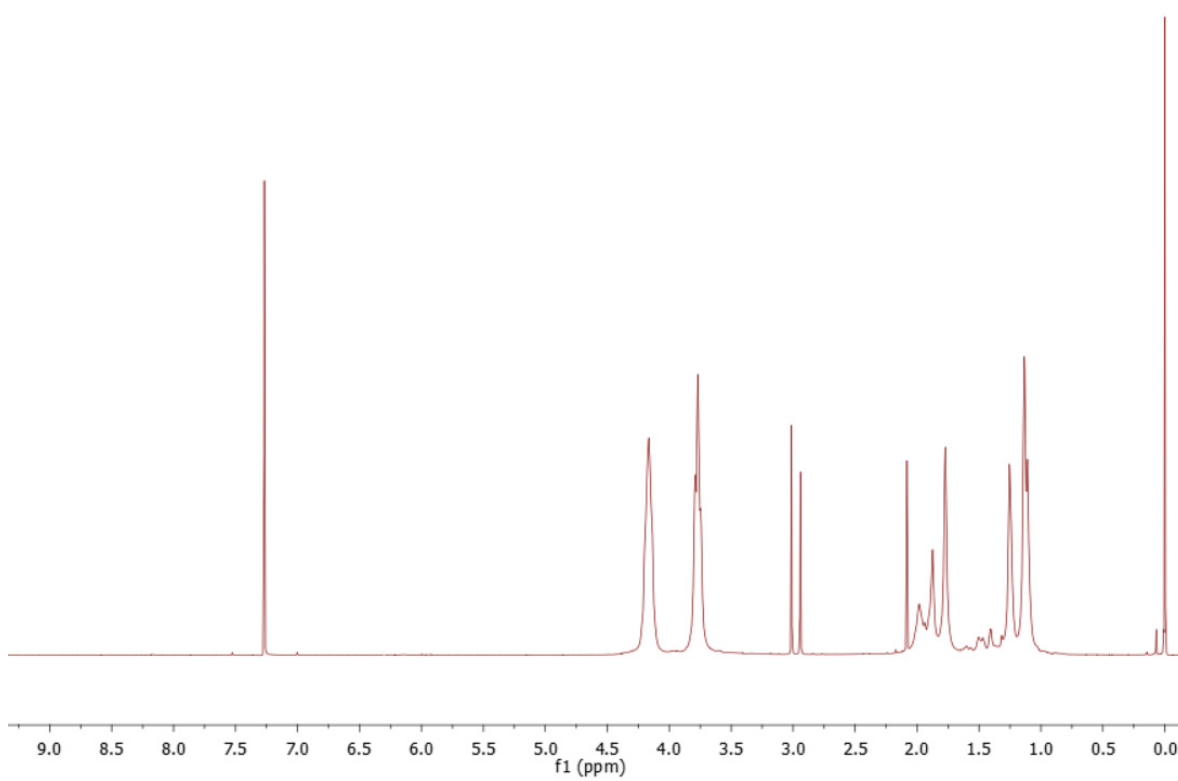

**Figure S3.** <sup>1</sup>H NMR spectrum of PIPOx-ABA measured in CDCl<sub>3</sub>.

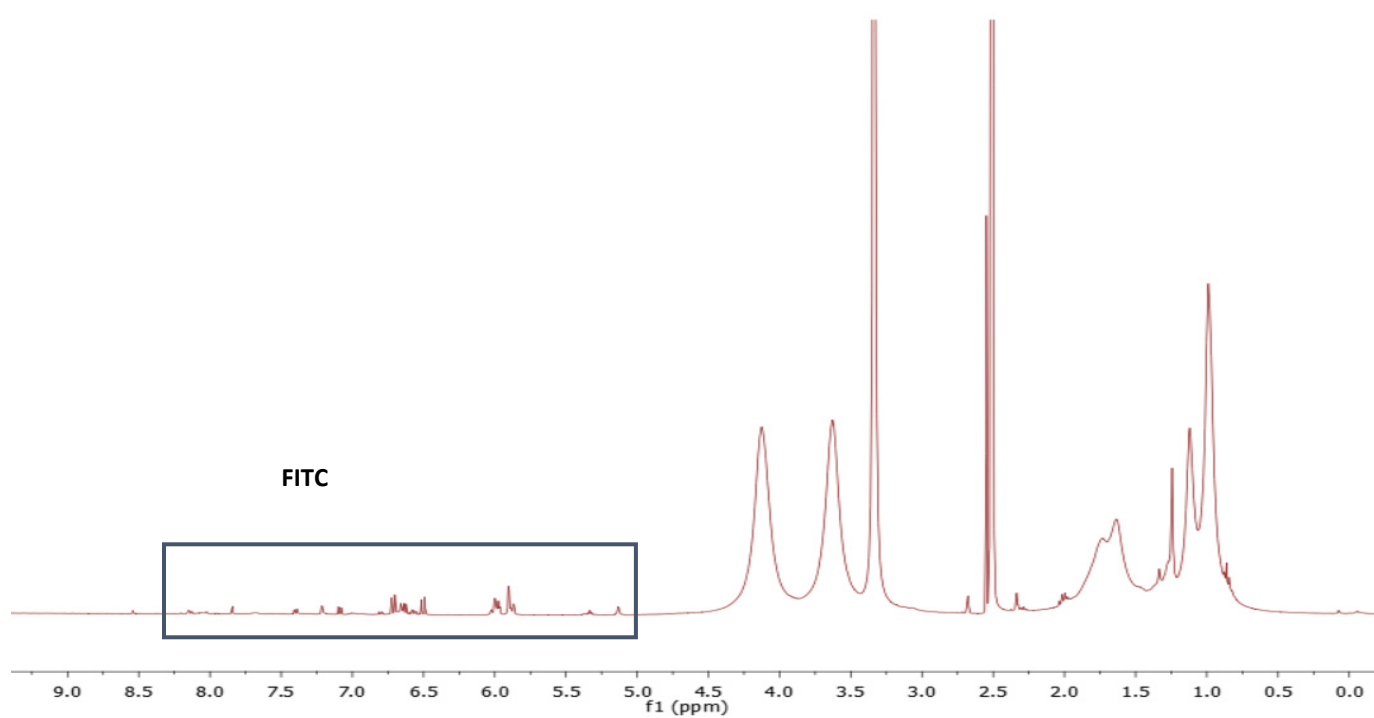

Figure S4.  $^1\text{H}$  NMR spectrum of PIPOx-FITC measured in  $\text{DMSO-d}_6$ .

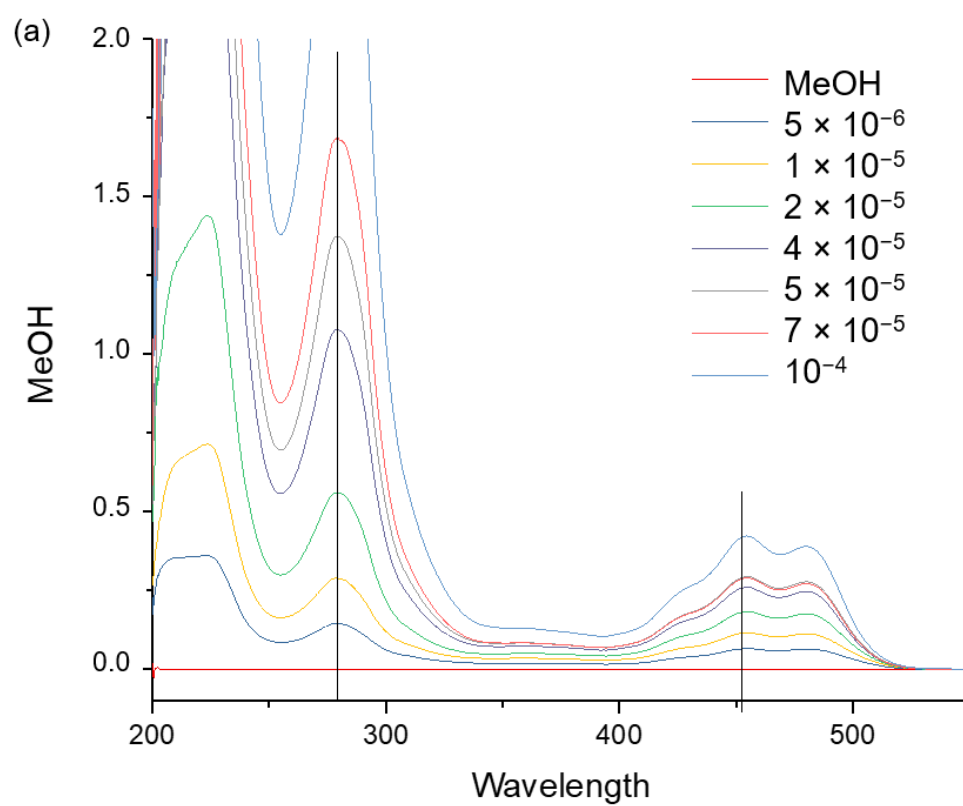

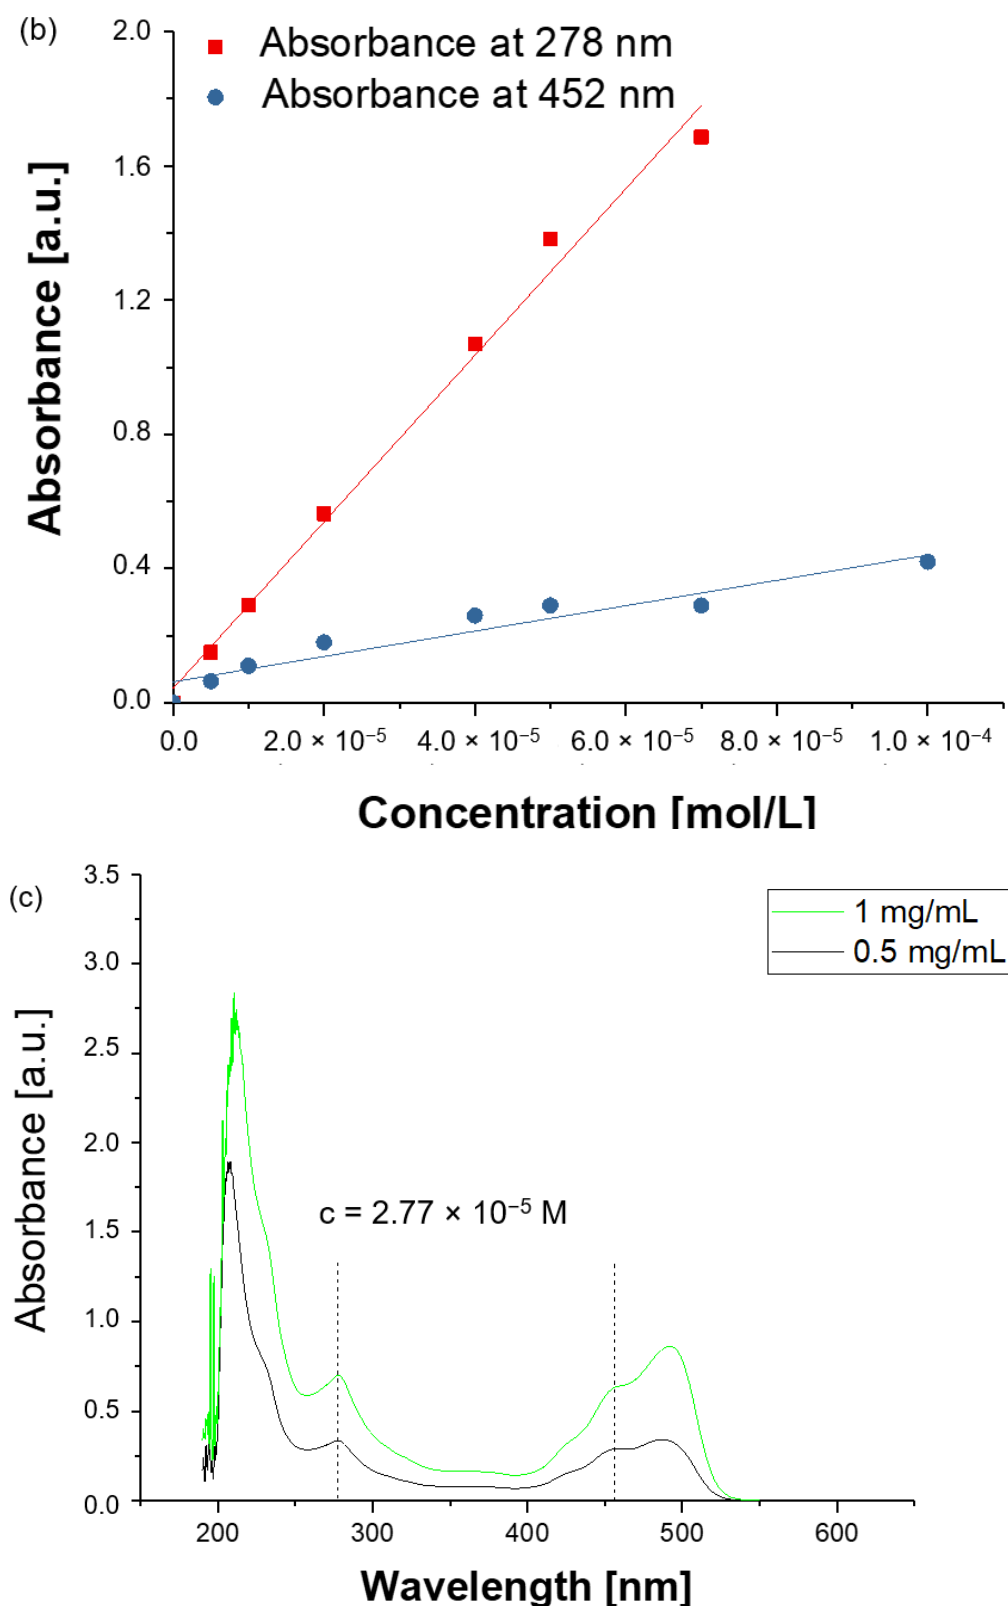

**Figure S5.** UV/Vis measurements of fluorescein isothiocyanate and PIPOx-FITC. (a) UV/Vis spectra of fluorescein isothiocyanate measured in methanol in the concentration range from  $5 \times 10^{-6} \text{ mol dm}^{-3}$  to  $10^{-4} \text{ mol dm}^{-3}$ . (b) Calibration curves of fluorescein isothiocyanate at 278 and 452 nm. (c) UV/Vis spectra of PIPOx-FITC measured in methanol in the concentrations of 0.5 and 1 mg/mL. Concentration of fluorescein unit in PIPOx-FITC calculated from calibration curve was equal to 1 mol %.
